# Supplementary figures and images for: A gene network for long-day flowering activatesRFT1encoding a mobile flowering signal in rice
Source: Oxford University Press journal article supplement (doi:10.1242/dev.040170), 2009-09-18

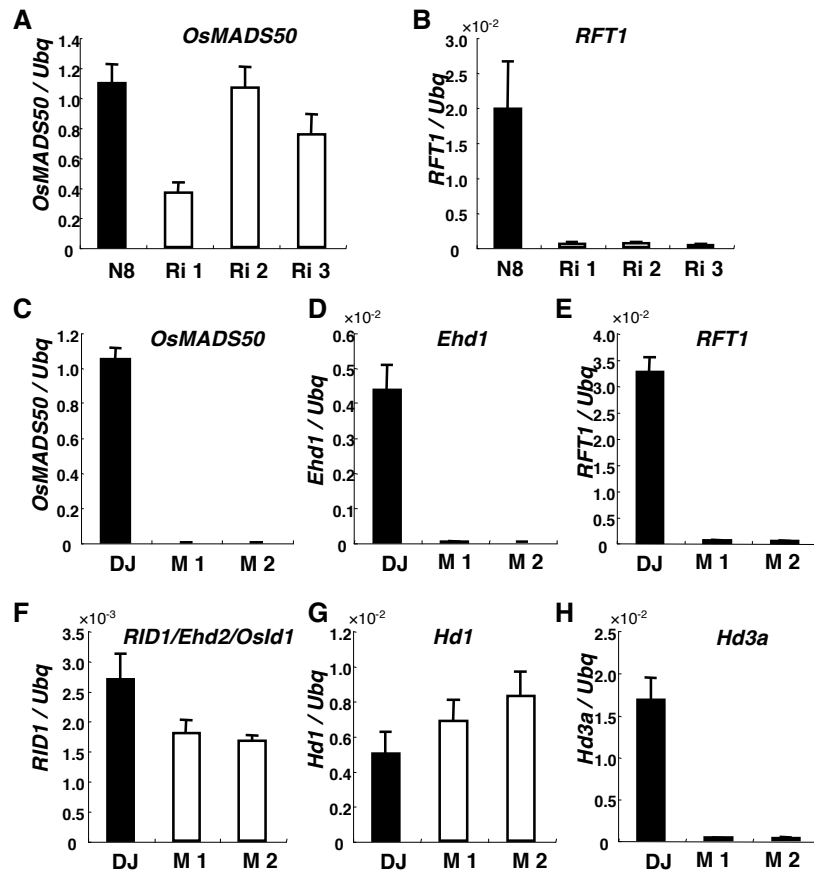

Supplement: dev040170-sup-040170figs1.pdf [file dev040170-sup-040170figs1.pdf]

**A**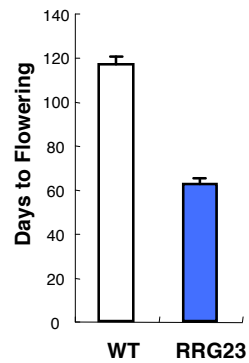**B**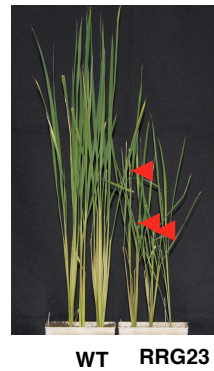**C**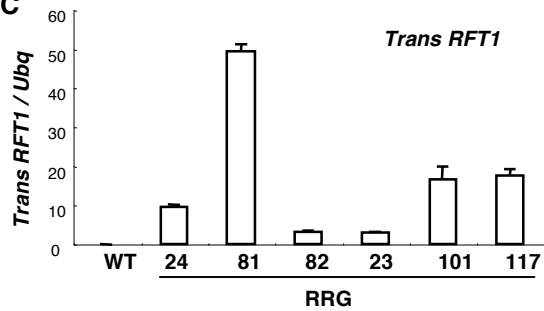

Supplement: dev040170-sup-040170figs2.pdf [file dev040170-sup-040170figs2.pdf]

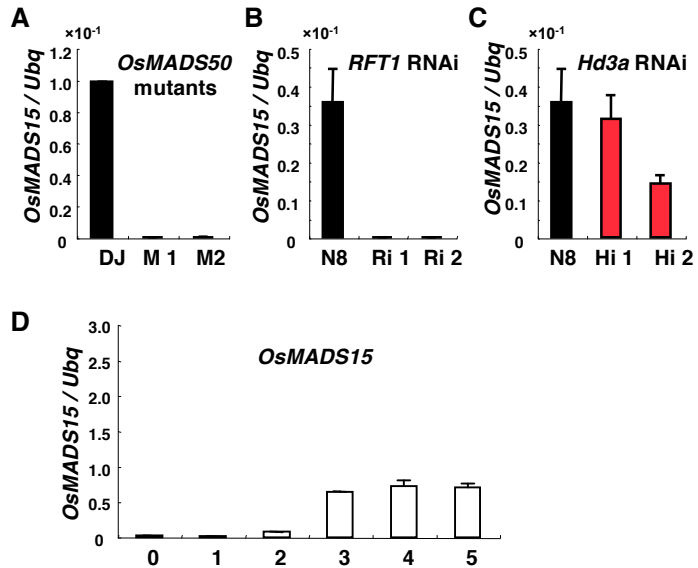

Supplement: dev040170-sup-040170figs3.pdf [file dev040170-sup-040170figs3.pdf]

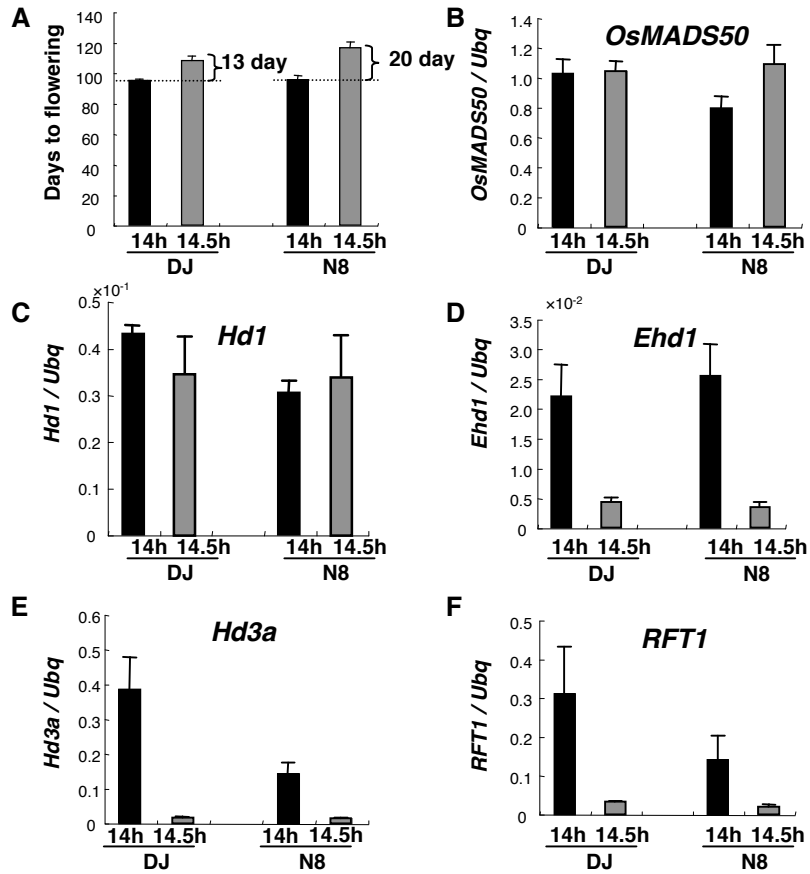

Supplement: dev040170-sup-040170figs4.pdf [file dev040170-sup-040170figs4.pdf]

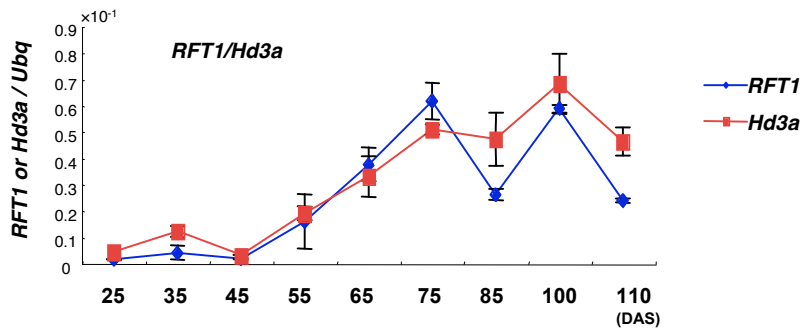

Supplement: dev040170-sup-040170figs5.pdf [file dev040170-sup-040170figs5.pdf]
